# Supplementary material for: Green and efficient magnetic micro-solid phase extraction utilizing tea waste impregnated with magnetic nanoparticles for the analysis of ibuprofen in water samples by using UV-vis spectrophotometry
Source: Royal Society of Chemistry journal article supplement (doi:10.1039/d4ra00940a), 2024-01-01
Supplement: d4ra00940a1.pdf [file d4ra00940a1.pdf]

**Green and Efficient Magnetic Micro-Solid Phase Extraction Utilizing Tea-waste Impregnated with Magnetic Nanoparticles for the Analysis of Ibuprofen (IBP) in Water Samples by using UV-Vis Spectrophotometry**

Yagulan Muniandy<sup>a</sup>, Muggundha Raoov<sup>a,b</sup>, Sharifah Mohamad<sup>a,b\*</sup>

*<sup>a</sup> Department of Chemistry, Faculty of Science, Universiti Malaya, 50603, Kuala Lumpur, Malaysia, <sup>b</sup> Universiti Malaya Centre for Ionic Liquids, Department of Chemistry, Faculty of Science, Universiti Malaya, Kuala Lumpur 50603, Malaysia*

\*Corresponding author: Prof. Dr. Sharifah Mohamad, Department of Chemistry, Faculty of Science, Universiti Malaya, sharifahm@um.edu.my

# List of Figures

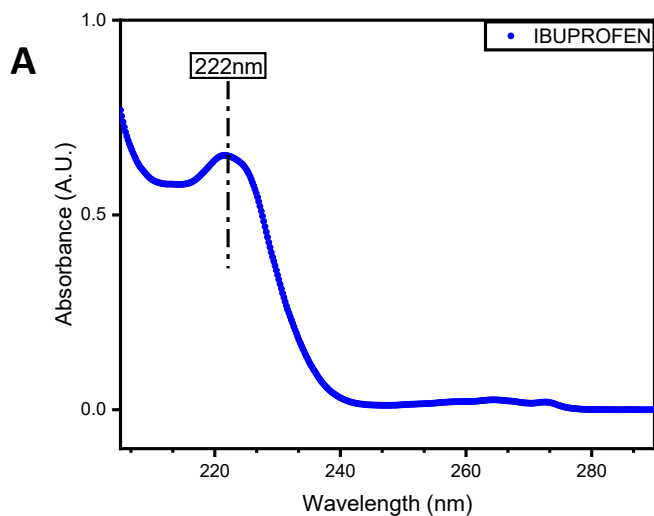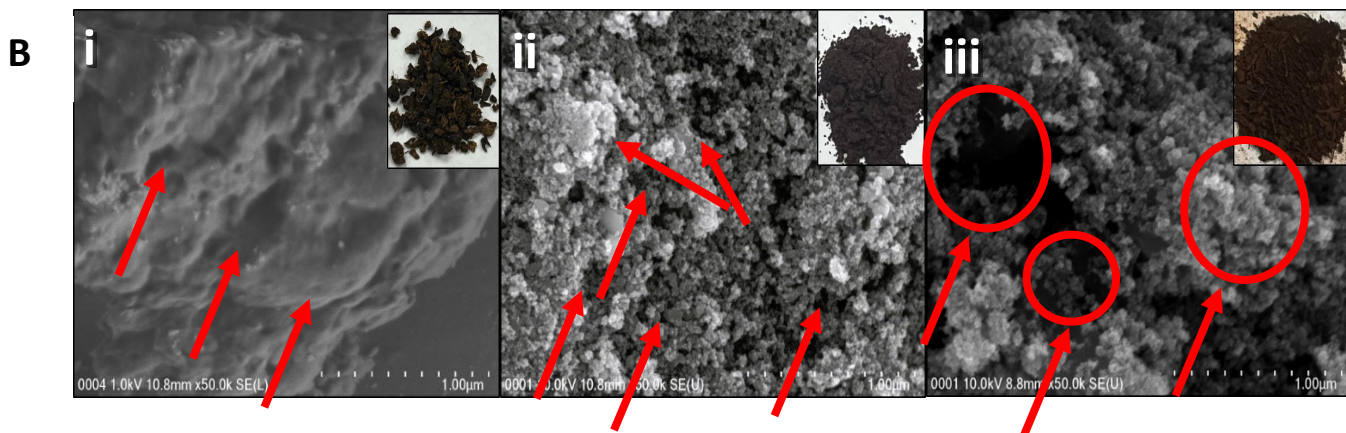

**Figure S1:** (A) The absorption of the UV-Vis spectra for IBP species at the 222nm absorption wavelength. (B) FESEM analysis of 50kx magnification: (i) TW, (ii) MNP, (iii) MNP-TW, inset: photographs of TW, MNP and MNP-TW

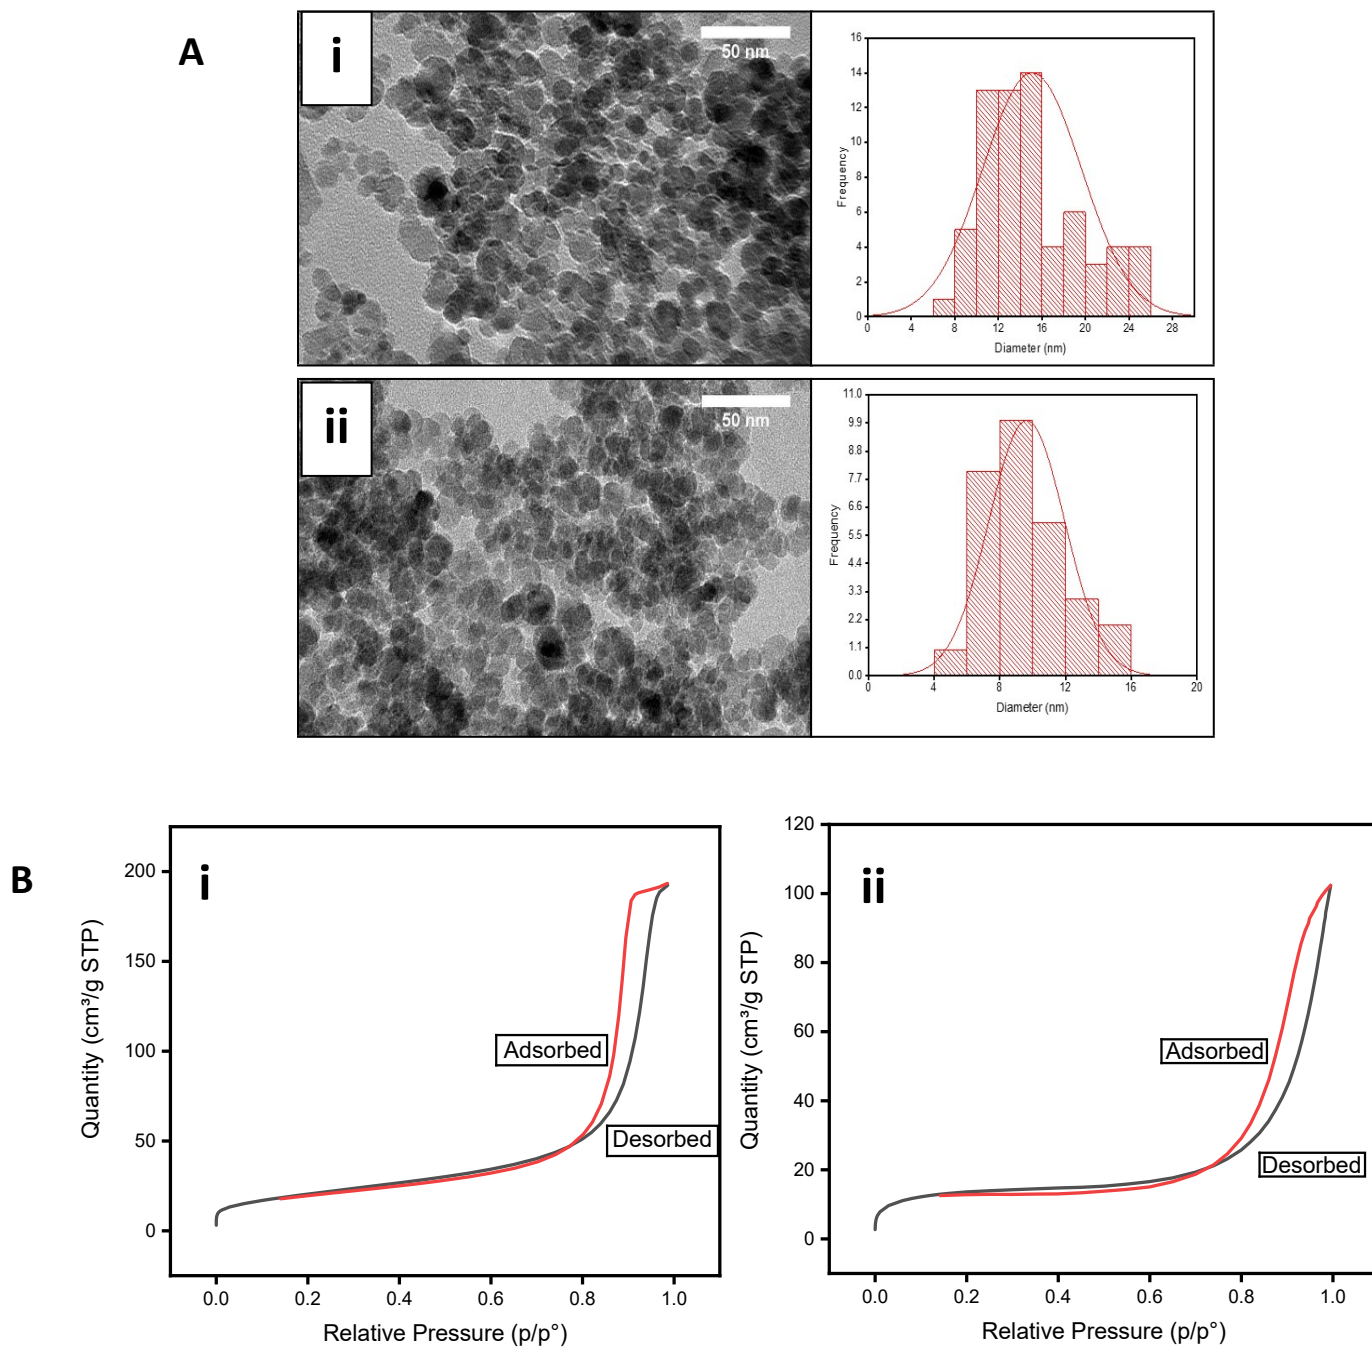

**Figure S2:**(A) TEM images of 50 nm scale image and corresponding particle diameter distributions of (i) MNP and (ii) MNP-TW. (B) BET Hysteresis loop of (i) MNP and (ii) MNP-TW

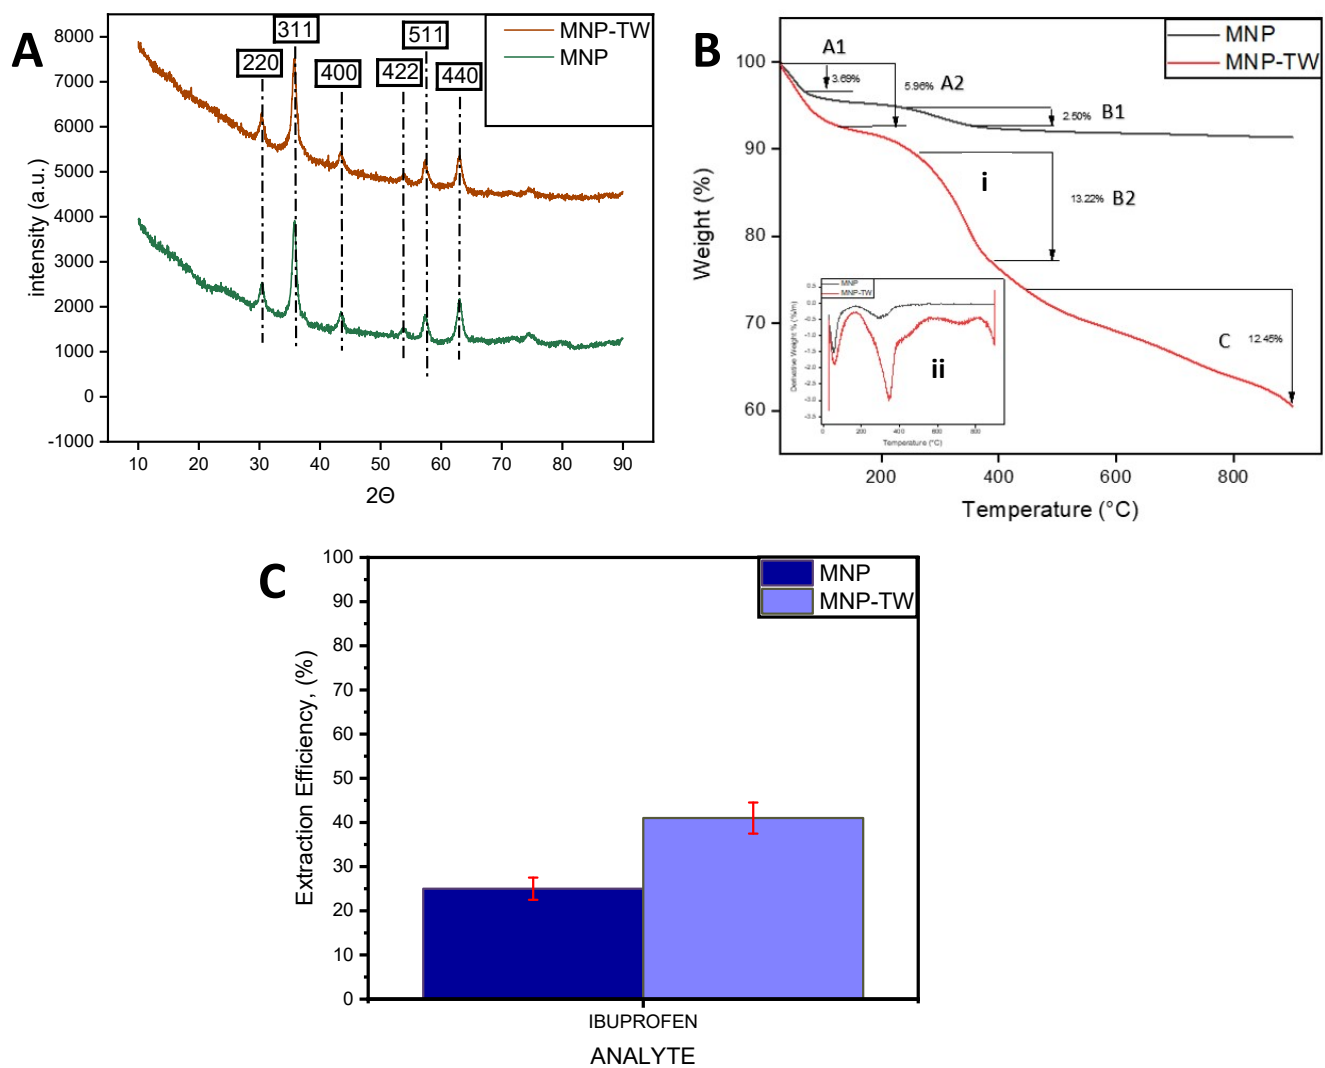

**Figure S3:** (A) XRD patterns of MNP and MNP-TW. (B) (i) TGA analysis (ii) DTA diagram of MNP and MNP-TW. (C) The extraction efficiency of MNP and MNP-TW.

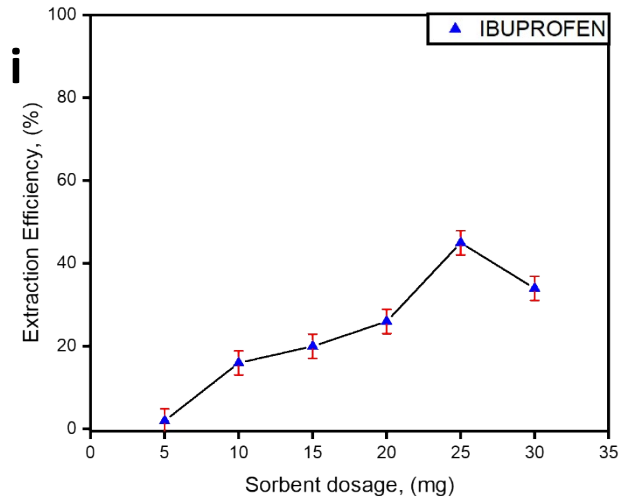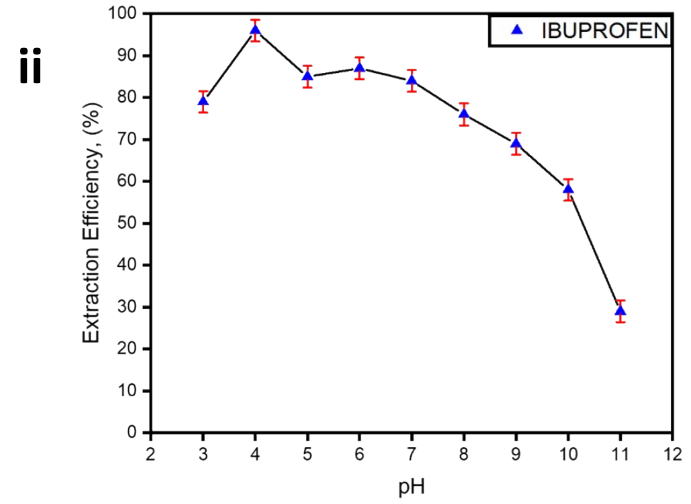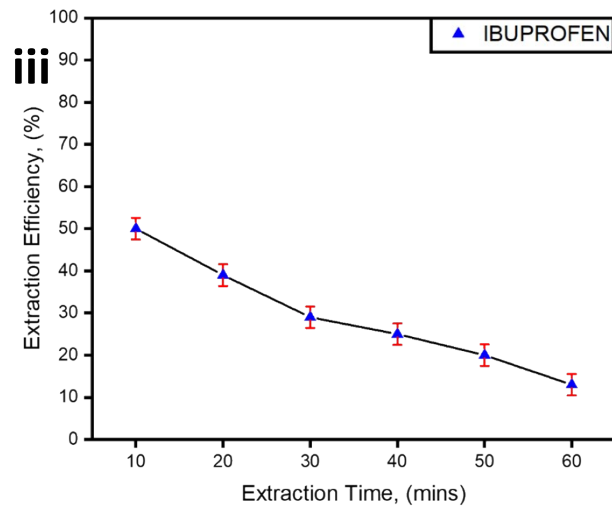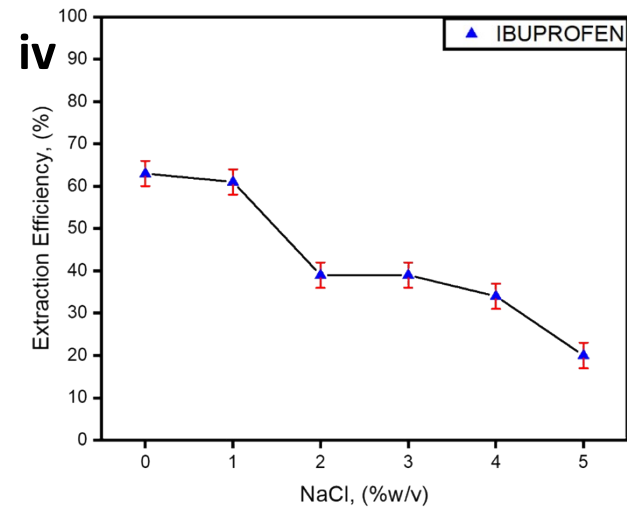

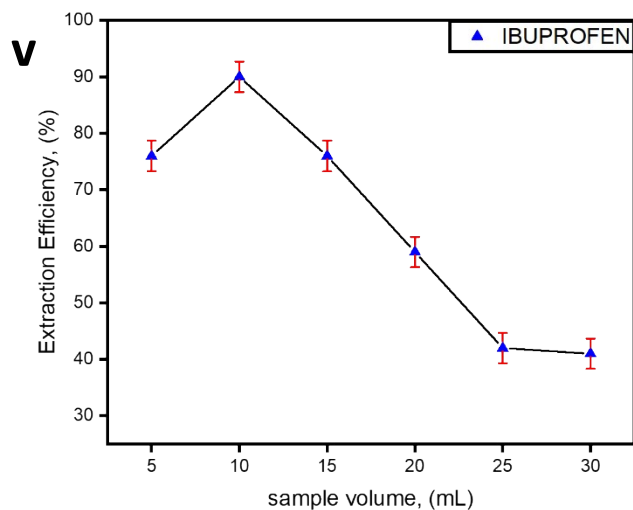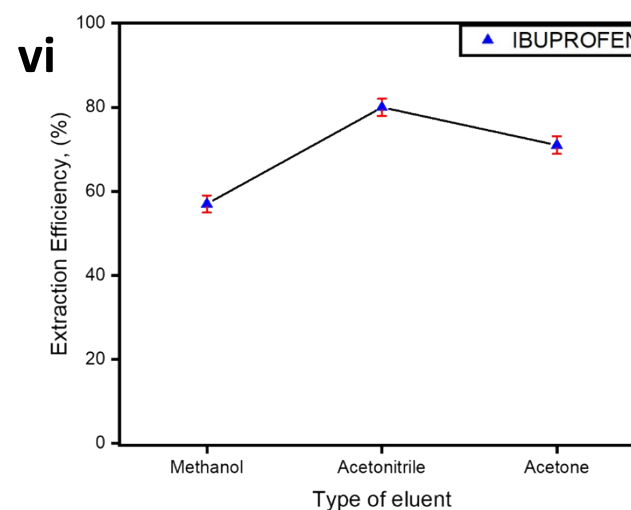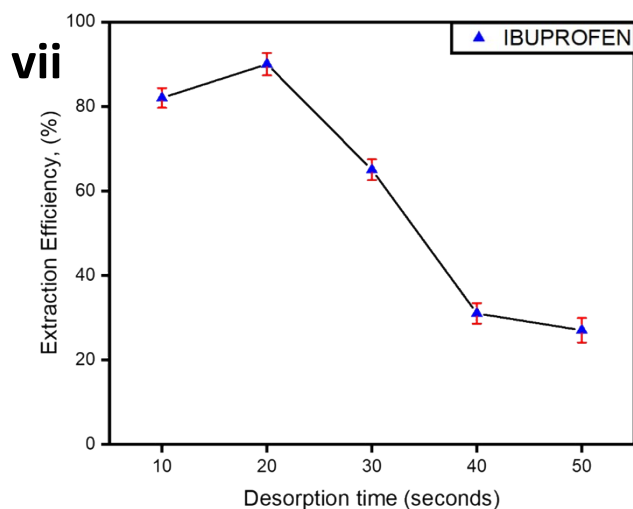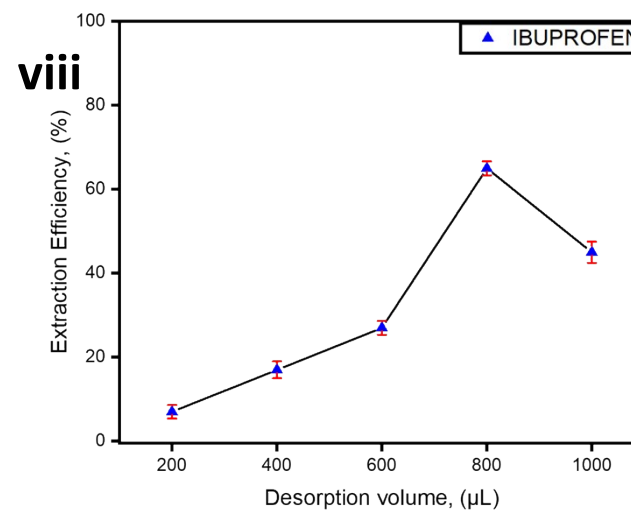

**Figure S4(i):** Effect of the sorbent dosage, **(ii):** Effect of pH, **(iii):** Effect of extraction time, **(iv):** Effect of ionic strength, **(v):** Effect of sample volume, **(vi):** Effect of desorption solvent, **(vii):** Effect of desorption time, **(viii):** Effect of desorption volume of MNP-TW on the magnetic micro-solid phase extraction efficiency of IBP (n=3)

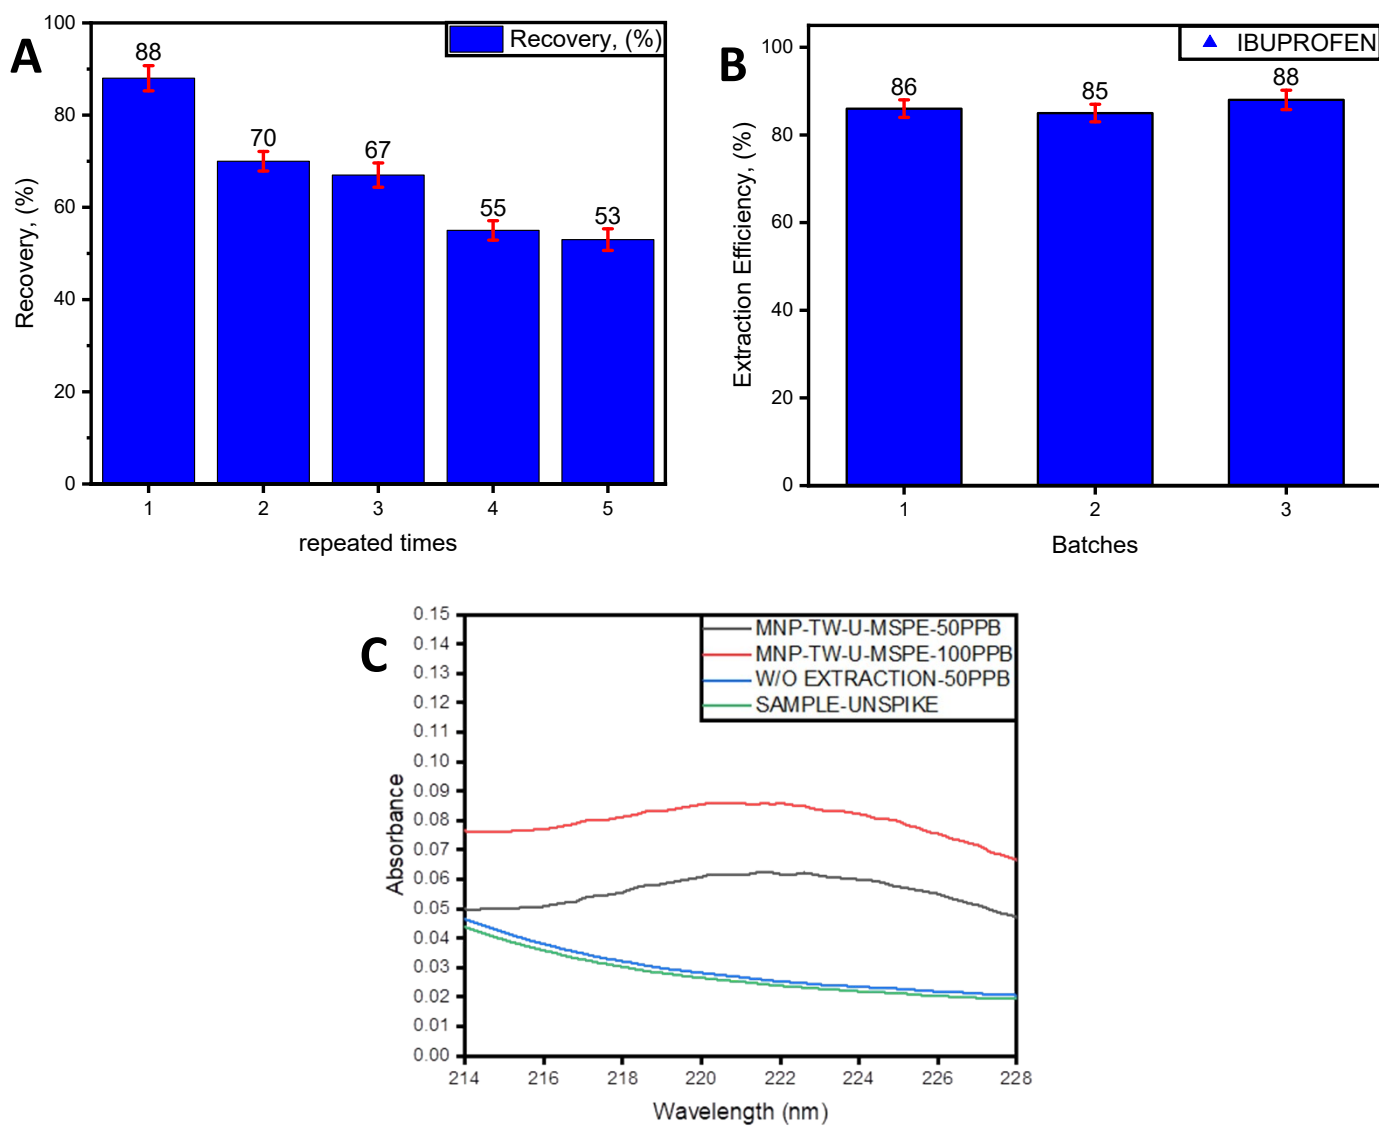

**Figure S5:** (A) The reusability analysis of MNP-TW. (B) MNP-TW reproducibility study. (C) Typical UV-Vis spectra of IBP in water sample using MNP-TW- $\mu$ -SPE.

## List of Tables

**Table S1:** Properties of Ibuprofen.

|                                         |                                                                                    |
|-----------------------------------------|------------------------------------------------------------------------------------|
| Molecular structure                     | 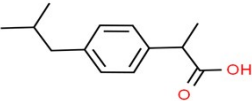 |
| Name                                    | Ibuprofen                                                                          |
| pK <sub>a</sub>                         | 4.52                                                                               |
| Log Kow                                 | 3.50                                                                               |
| Molecular weight (g mol <sup>-1</sup> ) | 206.3                                                                              |
| Chemical Formula                        | C <sub>13</sub> H <sub>18</sub> O <sub>2</sub>                                     |

**Table S2:** BET results

| Characteristics                               | MNP     | MNP-TW  |
|-----------------------------------------------|---------|---------|
| Surface area (m <sup>2</sup> /g)              | 67.14   | 48.38   |
| Pore volume (cm <sup>3</sup> /g)              | 0.30    | 0.16    |
| N <sub>2</sub> adsorption/desorption isotherm | Type IV | Type II |
| Hysteresis type loop                          | H1      | H3      |
| BJH pore diameter (nm)                        | 13.09   | 17.83   |

**Table S3:** TGA analysis of MNP and MNP-TW

| Adsorbents | Region | Temperature (°C) | Weight loss (%) | Assignment                                                                                          | Total weight loss (%) |
|------------|--------|------------------|-----------------|-----------------------------------------------------------------------------------------------------|-----------------------|
| MNP        | A1     | 36.38 – 108.29   | 3.69            | Water/ moisture loss                                                                                | 6.19                  |
|            | B1     | 226.12 – 369.95  | 2.50            | Volatile fractions                                                                                  |                       |
| MNP-TW     | A2     | 30.75 – 98.98    | 5.96            | Water/ moisture loss                                                                                | 31.63                 |
|            | B2     | 229.81 – 380.99  | 13.22           | Cellulose, hemicellulose, volatile fractions.                                                       |                       |
|            | C      | 463.95 – 898.66  | 12.45           | Devolatilization of thermally stable volatile compounds, oxidation of carbon, degradation of lignin |                       |



**Table S4:** Optimum conditions for the extraction of IBP by MNP-TW- $\mu$ -SPE technique

| <b>Parameter</b>  | <b>Ibuprofen</b>   |
|-------------------|--------------------|
| Dosage of sorbent | 25 mg              |
| pH                | 4                  |
| Extraction time   | 10 minutes         |
| Ionic Strength    | 0% (No NaCl added) |
| Type of eluent    | ACN                |
| Desorption time   | 20 seconds         |
| Desorption volume | 800 $\mu$ L        |
| Volume of sample  | 10 mL              |

**Table S5:** Analytical performance values of the developed MNP-TW- $\mu$ -SPE procedure in water sample matrices

| <b>Water</b>                                            | <b>Ibuprofen<br/>(222 nm)</b> |
|---------------------------------------------------------|-------------------------------|
| linearity ( $\mu$ g L <sup>-1</sup> )                   | 30 - 700                      |
| ( $R^2$ )                                               | 0.9983                        |
| LOD ( $\mu$ g L <sup>-1</sup> )                         | 9.40                          |
| LOQ ( $\mu$ g L <sup>-1</sup> )                         | 28.50                         |
| Intra-day, (N=3) RSD (%) at 300 $\mu$ g L <sup>-1</sup> | 1.48                          |
| Inter-day, (N=3) RSD (%) at 300 $\mu$ g L <sup>-1</sup> | 1.53                          |
| Pre-concentration factor at 300 $\mu$ g L <sup>-1</sup> | 116                           |

**Table S6:** Addition-Recoveries for IBP extracted from spiked water samples (n= 3).

| Analyte               | Samples        | Correlation of determination, R <sup>2</sup> | Spiking (µg L <sup>-1</sup> ) | Mean Recovery (%) (%RSD, n=3) |
|-----------------------|----------------|----------------------------------------------|-------------------------------|-------------------------------|
| Ibuprofen<br>(222 nm) | Tap water      | 0.9980                                       | 100                           | 94 (1.01)                     |
|                       |                |                                              | 400                           | 98 (1.71)                     |
|                       |                |                                              | 700                           | 113 (0.84)                    |
|                       | Effluent water |                                              | 100                           | 89 (4.54)                     |
|                       |                |                                              | 400                           | 86 (3.95)                     |
|                       |                |                                              | 700                           | 115 (1.06)                    |

**Table S7:** Interference study

| NSAIDs combinations | Mean Recovery (%) (%RSD, n=3) |                        |                        |
|---------------------|-------------------------------|------------------------|------------------------|
|                     | 100 µg L <sup>-1</sup>        | 400 µg L <sup>-1</sup> | 700 µg L <sup>-1</sup> |
| IBP                 | 100 (3.8)                     | 100 (0.5)              | 99 (0.1)               |
| IBP + DCF           | 99 (3.1)                      | 101 (0.8)              | 101 (0.2)              |
| IBP + NAP           | 104 (2.5)                     | 99 (0.5)               | 99 (0.4)               |
| IBP + DCF + NAP     | 104 (2.3)                     | 102 (0.5)              | 99 (0.4)               |

**Table S8:** AES scores of the MNP-TW-µ-SPE method

| Reagents                              | Penalty points |
|---------------------------------------|----------------|
| Ammonia (25%) 5 mL                    | 6              |
| Solvents                              | 6              |
|                                       | ∑ 12           |
| Instruments                           | Penalty points |
| UV-Vis Spectrophotometer              | 0              |
| Stirrer                               | 2              |
| Orbital shaker                        | 2              |
| Occupational Hazard                   | 3              |
| Waste                                 | 5              |
|                                       | ∑ 12           |
| Total penalty points: 24              |                |
| <b>AES Total score: (100-24) = 76</b> |                |
